# Supplementary material
Source: publisher figshare collection journal article supplement (https://springernature.figshare.com/ndownloader/files/12979319)
Supplement: Supplementary file [file 12979319]

**Table S5** Reactor operating length and steady state length at each residence time (RT). R1 was the control reactor always running at RT = 20 days and R2 & R3 had decreasing RTs.

| RT<br>(days) | Total         |       |                                     |                                             | Steady state  |       |                                      |                                             |
|--------------|---------------|-------|-------------------------------------|---------------------------------------------|---------------|-------|--------------------------------------|---------------------------------------------|
|              | Length (days) |       | Time period                         |                                             | Length (days) |       | Time period                          |                                             |
|              | R1            | R2&R3 | R1                                  | R2&R3                                       | R1            | R2&R3 | R1                                   | R2&R3                                       |
| <b>20</b>    | 212           | 110   | 1 <sup>st</sup> – 212 <sup>th</sup> | 1 <sup>st</sup> – 110 <sup>th</sup>         | 152           | 50    | 61 <sup>th</sup> – 214 <sup>th</sup> | 61 <sup>th</sup> – 110 <sup>th</sup>        |
| <b>10</b>    |               | 50    |                                     | 111 <sup>st</sup> – 160 <sup>th</sup>       |               | 20    |                                      | 141 <sup>th</sup> – 160 <sup>th</sup>       |
| <b>5</b>     |               | 40.5  |                                     | 160.5 <sup>th</sup> – 200.5 <sup>th</sup>   |               | 25.5  |                                      | 175.5 <sup>th</sup> – 200.5 <sup>th</sup>   |
| <b>3.3</b>   |               | 13.3  |                                     | 200.67 <sup>th</sup> – 213.67 <sup>th</sup> |               | 3.3   |                                      | 210.67 <sup>th</sup> – 213.67 <sup>th</sup> |
